# Supplementary material for: The Relation between Frequency of E-Cigarette Use and Frequency and Intensity of Cigarette Smoking among South Korean Adolescents
Source: PubMed Central journal article supplement (PMC5369141; doi:10.3390/ijerph14030305), 2017-03-14
Supplement: ijerph-14-00305-s001.pdf [file ijerph-14-00305-s001.pdf]

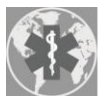

# Supplementary Materials: The Relation between Frequency of E-Cigarette Use and Frequency and Intensity of Cigarette Smoking among South Korean Adolescents

Jung Ah Lee <sup>1</sup>, Sungkyu Lee <sup>2</sup> and Hong-Jun Cho <sup>1,\*</sup>

Table S1. Comparison between cigarette only users and dual users.

|                                                |                    | Cigarette Only User<br>(N = 5856) | Dual User<br>(N = 5772) | p-Value |
|------------------------------------------------|--------------------|-----------------------------------|-------------------------|---------|
|                                                |                    | Mean±SE or N (%)                  |                         |         |
| Age (years)                                    | Mean±SE            | 15.73±0.3                         | 15.95±0.03              | <0.001  |
|                                                | 7                  | 349 (4.7)                         | 135 (1.8)               | <0.001  |
|                                                | 8                  | 649 (9.7)                         | 530 (8.3)               |         |
| Grade                                          | 9                  | 913 (15.2)                        | 838 (14.1)              |         |
|                                                | 10                 | 1143 (20.4)                       | 1208 (21.2)             |         |
|                                                | 11                 | 1350 (24.1)                       | 1479 (26.3)             |         |
|                                                | 12                 | 1452 (25.9)                       | 1582 (28.4)             |         |
| Sex                                            | Boy                | 4002 (68.6)                       | 4736 (82.7)             | <0.001  |
|                                                | Girl               | 1854 (31.4)                       | 1036 (17.3)             |         |
| Smoking within 1 month                         | Not within 1 month | 4482 (76.7)                       | 2023 (34.5)             | <0.001  |
|                                                | 1–2 days/month     | 417 (7.0)                         | 455 (7.7)               |         |
|                                                | 3–5 days/month     | 170 (2.8)                         | 233 (4.0)               |         |
|                                                | 6–9 days/month     | 118 (2.1)                         | 222 (3.9)               |         |
|                                                | 10–19 days/month   | 143 (2.4)                         | 354 (6.2)               |         |
|                                                | 20–29 days/month   | 115 (2.0)                         | 387 (7.1)               |         |
|                                                | Daily              | 411 (7.1)                         | 2098 (36.6)             |         |
| Smoking amount within 1 month (cigarettes/day) | None               | 4482 (76.7)                       | 2023 (34.5)             | <0.001  |
|                                                | <1                 | 428 (7.3)                         | 410 (7.2)               |         |
|                                                | 1                  | 179 (2.9)                         | 266 (4.6)               |         |
|                                                | 2–5                | 448 (7.5)                         | 1311 (23.2)             |         |
|                                                | 6–9                | 185 (3.1)                         | 946 (16.6)              |         |
|                                                | 10–19              | 82 (1.5)                          | 530 (8.6)               |         |
|                                                | ≥20                | 52 (0.9)                          | 286 (5.2)               |         |

SE: Standard error.
